# Supplementary material for: The acute effect of metabolic cofactor supplementation: a potential therapeutic strategy against non‐alcoholic fatty liver disease
Source: PubMed Central journal article supplement (PMC7184219; doi:10.15252/msb.209495), 2020-04-27
Supplement: MSB-16-e9495-s002.pdf [file MSB-16-e9495-s002.pdf]

# Table of Contents

## **The acute effect of metabolic cofactor supplementation, a potential therapeutic strategy against non-alcoholic fatty liver disease**

Cheng Zhang<sup>1,2,.,#</sup>, Elias Bjornson<sup>3,4,#</sup>, Muhammad Arif<sup>1,#</sup>, Abdellah Tebani<sup>1</sup>, Alen Lovric<sup>1,§</sup>, Rui Benfeitas<sup>1,□</sup>, Mehmet Ozcan<sup>1</sup>, Kajetan Juszcak<sup>1</sup>, Woonghee Kim<sup>1</sup>, Jung Tae Kim<sup>1</sup>, Gholamreza Bidkhor<sup>5</sup>, Marcus Ståhlman<sup>3</sup>, Per-Olof Bergh<sup>3</sup>, Martin Adiels<sup>3</sup>, Hasan Turkez<sup>6</sup>, Marja-Riitta Taskinen<sup>7</sup>, Jim Bosley<sup>8</sup>, Hanns-Ulrich Marschall<sup>3</sup>, Jens Nielsen<sup>4</sup>, Mathias Uhlén<sup>1</sup>, Jan Borén<sup>3,\*</sup>, Adil Mardinoglu<sup>1,5,\*</sup>

**Appendix Table S1**

**Appendix Table S2**

**Appendix Table S3**

**Appendix Figure S1**

**Appendix Figure S2**

**Appendix Figure S3**

**Appendix Figure S4**

**Appendix Figure S5**

**Appendix Figure S6**

**Appendix Table S1. Observations and measurements**

| <b>SIG-41</b>                               |                          |                           |                       |                     |
|---------------------------------------------|--------------------------|---------------------------|-----------------------|---------------------|
| <b>Group 1 females, Dos level 304 mg/kg</b> |                          |                           |                       |                     |
| <b>Observation</b>                          | <b>Number of animals</b> | <b>Number of obs./day</b> | <b>From study day</b> | <b>To study day</b> |
| Nothing abnormally detected (NAD)           | 3                        | 21                        | 1                     | 7                   |
| PILO                                        | 2                        | 2                         | 1                     | 1                   |
| Excessive chewing (EXCH)                    | 2                        | 2                         | 1                     | 1                   |

| <b>SIG-41</b>                                |                          |                           |                       |                     |
|----------------------------------------------|--------------------------|---------------------------|-----------------------|---------------------|
| <b>Group 2 females, Dos level 3040 mg/kg</b> |                          |                           |                       |                     |
| <b>Observation</b>                           | <b>Number of animals</b> | <b>Number of obs./day</b> | <b>From study day</b> | <b>To study day</b> |
| Nothing abnormally detected (NAD)            | 3                        | 21                        | 1                     | 7                   |
| Plouing in the bedding (PLOU)                | 2                        | 11                        | 2                     | 7                   |
| Pilo erection (PILO)                         | 3                        | 3                         | 1                     | 1                   |
| Excessive chewing (EXCH)                     | 3                        | 3                         | 1                     | 1                   |
| Motor activity decreased (MADE)              | 2                        | 2                         | 1                     | 1                   |
| Eyes half shut (EYHS)                        | 3                        | 3                         | 1                     | 1                   |

| <b>SIG-41</b>                                      |                          |                           |                       |                     |
|----------------------------------------------------|--------------------------|---------------------------|-----------------------|---------------------|
| <b>Group 3 females, Dos level 11820/7880 mg/kg</b> |                          |                           |                       |                     |
| <b>Observation</b>                                 | <b>Number of animals</b> | <b>Number of obs./day</b> | <b>From study day</b> | <b>To study day</b> |
| Nothing abnormally detected (NAD)                  | 3                        | 21                        | 1                     | 7                   |
| Ploughing in the bedding (PLOU)                    | 3                        | 18                        | 1                     | 7                   |
| Pilo erection (PILO)                               | 3                        | 3                         | 1                     | 1                   |
| Excessive chewing (EXCH)                           | 3                        | 3                         | 1                     | 1                   |
| Vocalisation during handling (VODH)                | 1                        | 2                         | 6                     | 7                   |
| Difficulty dosing (DIDO)                           | 1                        | 1                         | 3                     | 3                   |
| Ataxia (ATAX)                                      | 2                        | 2                         | 2                     | 2                   |
| Cyanosis (CYAN)                                    | 1                        | 1                         | 2                     | 2                   |
| Respiration irregular (REIR)                       | 1                        | 2                         | 1                     | 2                   |
| Respiration noisy (RENO)                           | 1                        | 1                         | 1                     | 1                   |
| Motor activity decreased (MADE)                    | 3                        | 5                         | 1                     | 2                   |
| Eyes half shut (EYHS)                              | 3                        | 4                         | 1                     | 2                   |

Observations:

Observations were made daily after dosing until “No Adverse Finding” is observed and recorded. If adverse findings were observed, they were recorded during 0-30 MAD, 1-6 HAD, and 6-24 HAD, or more frequently if found necessary.

Body weight

Body weights were recorded prior to first dosing Day 1 and anytime if decline in general condition was observed.

## Appendix Table S2. Haematology data

| SIG-41       |        |       |                | WBC                  | LYM                  | MONO                 | GRAN                 | LYM  | MONO | GRAN | HGB | HCT  | RBC                   | MCV  | MCH  | MCHC | RDW% | RDWa | PLT                  | MPV |
|--------------|--------|-------|----------------|----------------------|----------------------|----------------------|----------------------|------|------|------|-----|------|-----------------------|------|------|------|------|------|----------------------|-----|
| ID/Animal no | Gender | Group | /Analysis date | (10 <sup>9</sup> /L) | (10 <sup>9</sup> /L) | (10 <sup>9</sup> /L) | (10 <sup>9</sup> /L) | %    | %    | %    | g/L | %    | (10 <sup>12</sup> /L) | fl   | pg   | g/dL | %    | fl   | (10 <sup>9</sup> /L) | fl  |
| 1            | F      | 1     | 20-Dec-17      | 8.1                  | 7.2                  | 0.2                  | 0.7                  | 88.9 | 1.4  | 9.7  | 152 | 42.5 | 8.35                  | 50.9 | 18.2 | 357  | 17.9 | 32.9 | 574                  | 5.8 |
| 2            | F      | 1     | 20-Dec-17      | 5.4                  | 4.7                  | 0.1                  | 0.6                  | 86.5 | 2.1  | 11.4 | 145 | 39.4 | 7.93                  | 49.7 | 18.3 | 369  | 18.6 | 32.8 | 632                  | 5.8 |
| 3            | F      | 1     | 20-Dec-17      | 6.4                  | 4.9                  | 0.2                  | 1.3                  | 77.2 | 2.5  | 20.3 | 151 | 39.8 | 8.02                  | 49.6 | 18.8 | 380  | 18.1 | 32.3 | 592                  | 6.0 |
| 4            | F      | 2     | 20-Dec-17      | 7.7                  | 6.0                  | 0.4                  | 1.3                  | 78.3 | 4.9  | 16.8 | 152 | 40.5 | 7.79                  | 52.0 | 19.5 | 375  | 18.6 | 34.7 | 607                  | 5.9 |
| 5            | F      | 2     | 20-Dec-17      | 9.6                  | 8.7                  | 0.3                  | 0.6                  | 91.4 | 1.6  | 7.0  | 152 | 40.7 | 7.88                  | 51.6 | 19.4 | 375  | 18.6 | 34.2 | 701                  | 5.9 |
| 6            | F      | 2     | 20-Dec-17      | 6.9                  | 5.7                  | 0.2                  | 1.0                  | 83.4 | 2.1  | 14.5 | 143 | 37.7 | 7.72                  | 48.9 | 18.6 | 380  | 18.0 | 31.0 | 656                  | 5.4 |
| 7            | F      | 3     | 20-Dec-17      | 6.9                  | 5.5                  | 0.2                  | 1.2                  | 79.2 | 2.4  | 18.4 | 154 | 40.9 | 8.30                  | 49.2 | 18.6 | 378  | 19.2 | 32.7 | 737                  | 5.7 |
| 8            | F      | 3     | 20-Dec-17      | 7.1                  | 5.5                  | 0.3                  | 1.3                  | 76.9 | 4.8  | 18.3 | 141 | 36.9 | 7.28                  | 50.7 | 19.4 | 383  | 18.5 | 33.6 | 543                  | 5.7 |
| 9            | F      | 3     | 20-Dec-17      | 7.2                  | 5.8                  | 0.3                  | 1.1                  | 81.3 | 2.5  | 16.2 | 145 | 38.8 | 7.60                  | 51.1 | 19.1 | 374  | 18.7 | 33.8 | 697                  | 5.7 |

The below parameters were analyzed and evaluated. Red cell distribution width (absolute) and Mean platelet volume were also analyzed as part of the test kit used for the analyses, but are reported in the Pathology evaluation.

|                                        |      |
|----------------------------------------|------|
| Red blood cells                        | RBC  |
| Red cell distribution width (%)        | RDW% |
| Red cell distribution width (absolute) | RDWa |
| Mean red cell hemoglobin               | MCH  |
| Hematocrit                             | HCT  |
| Mean red cell hemoglobin concentration | MCHC |
| Mean red cell volume                   | MCV  |
| Hemoglobin                             | HGB  |
| Platelets                              | PLT  |
| Mean platelet volume                   | MPV  |
| White blood cells                      | WBC  |
| Lymphocytes                            | LYM  |
| Granulocytes                           | GRAN |
| Monocytes                              | MONO |

**Appendix Table S3. Plasma chemistry data**

| SIG-41       |        |       | Sample/       | ALB | ALP | ALT | AMY | TBIL   | BUN    | CA     | PHOS   | CRE    | GLU    | NA+    | K+     | TP  | GLOB |
|--------------|--------|-------|---------------|-----|-----|-----|-----|--------|--------|--------|--------|--------|--------|--------|--------|-----|------|
| ID/Animal no | Gender | Group | Analysis date | g/L | U/L | U/L | U/L | μmol/L | mmol/L | mmol/L | mmol/L | μmol/L | mmol/L | mmol/L | mmol/L | g/L | g/L  |
| 1            | F      | 1     | 20-Dec-17     | 61  | 162 | 33  | 550 | 5      | 4,8    | 2,84   | 2,08   | 62     | 9,4    | 139    | 3,7    | 68  | 7    |
| 2            | F      | 1     | 20-Dec-17     | 72  | 139 | 26  | 603 | 5      | 6,3    | 2,92   | 1,72   | 49     | 8,7    | 138    | 4,1    | 77  | 0    |
| 3            | F      | 1     | 20-Dec-17     | 65  | 158 | 44  | 606 | 5      | 5,4    | 3,01   | 2,52   | 43     | 7,8    | 139    | 4,5    | 76  | 11   |
| 4            | F      | 2     | 20-Dec-17     | 72  | 198 | 49  | 689 | 5      | 7,0    | 2,93   | 2,04   | 28     | 7,6    | 137    | 4,1    | 78  | 0    |
| 5            | F      | 2     | 20-Dec-17     | 64  | 163 | 35  | 725 | 5      | 6,1    | 3,02   | 2,24   | 40     | 8,6    | 140    | 4,5    | 71  | 7    |
| 6            | F      | 2     | 20-Dec-17     | 62  | 111 | 27  | 647 | 5      | 7,1    | 2,87   | 2,20   | 18     | 9,2    | 136    | 4,6    | 67  | 5    |
| 7            | F      | 3     | 20-Dec-17     | 65  | 128 | 32  | 644 | 5      | 6,0    | 2,90   | 2,25   | 26     | 8,9    | 138    | 4,6    | 72  | 8    |
| 8            | F      | 3     | 20-Dec-17     | 62  | 123 | 26  | 566 | 5      | 5,3    | 2,91   | 2,24   | 43     | 8,8    | 139    | 5,1    | 68  | 6    |
| 9            | F      | 3     | 20-Dec-17     | 61  | 102 | 28  | 650 | 5      | 5,6    | 2,89   | 2,06   | 39     | 7,5    | 138    | 4,0    | 69  | 8    |

|                          |                  |
|--------------------------|------------------|
| Albumin                  | ALB              |
| Alanine aminotransferase | ALT              |
| Alkaline phosphatase     | ALP              |
| Amylase                  | AMYL             |
| Bilirubin (total)        | TBIL             |
| Blood urea nitrogen      | BUN              |
| Calcium                  | Ca <sup>++</sup> |
| Creatinine               | CREA             |
| Globulin                 | GLOB             |
| Glucose                  | GLU              |
| Phosphate                | PHOS             |
| Potassium                | K <sup>+</sup>   |
| Sodium                   | Na <sup>+</sup>  |
| Total protein            | TP               |

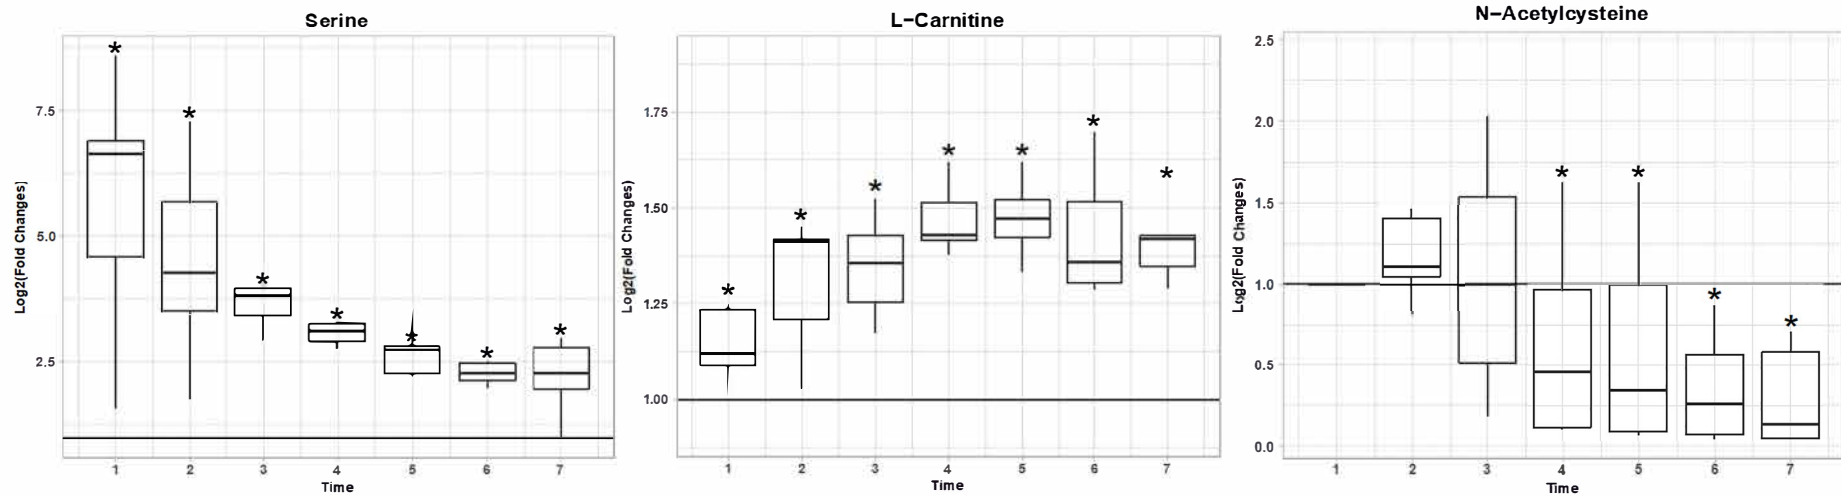

**Appendix Figure S1.** Changes in plasma level of each metabolic cofactor (except for NR) in supplementation study compared to baseline based on targeted metabolomics measurement.

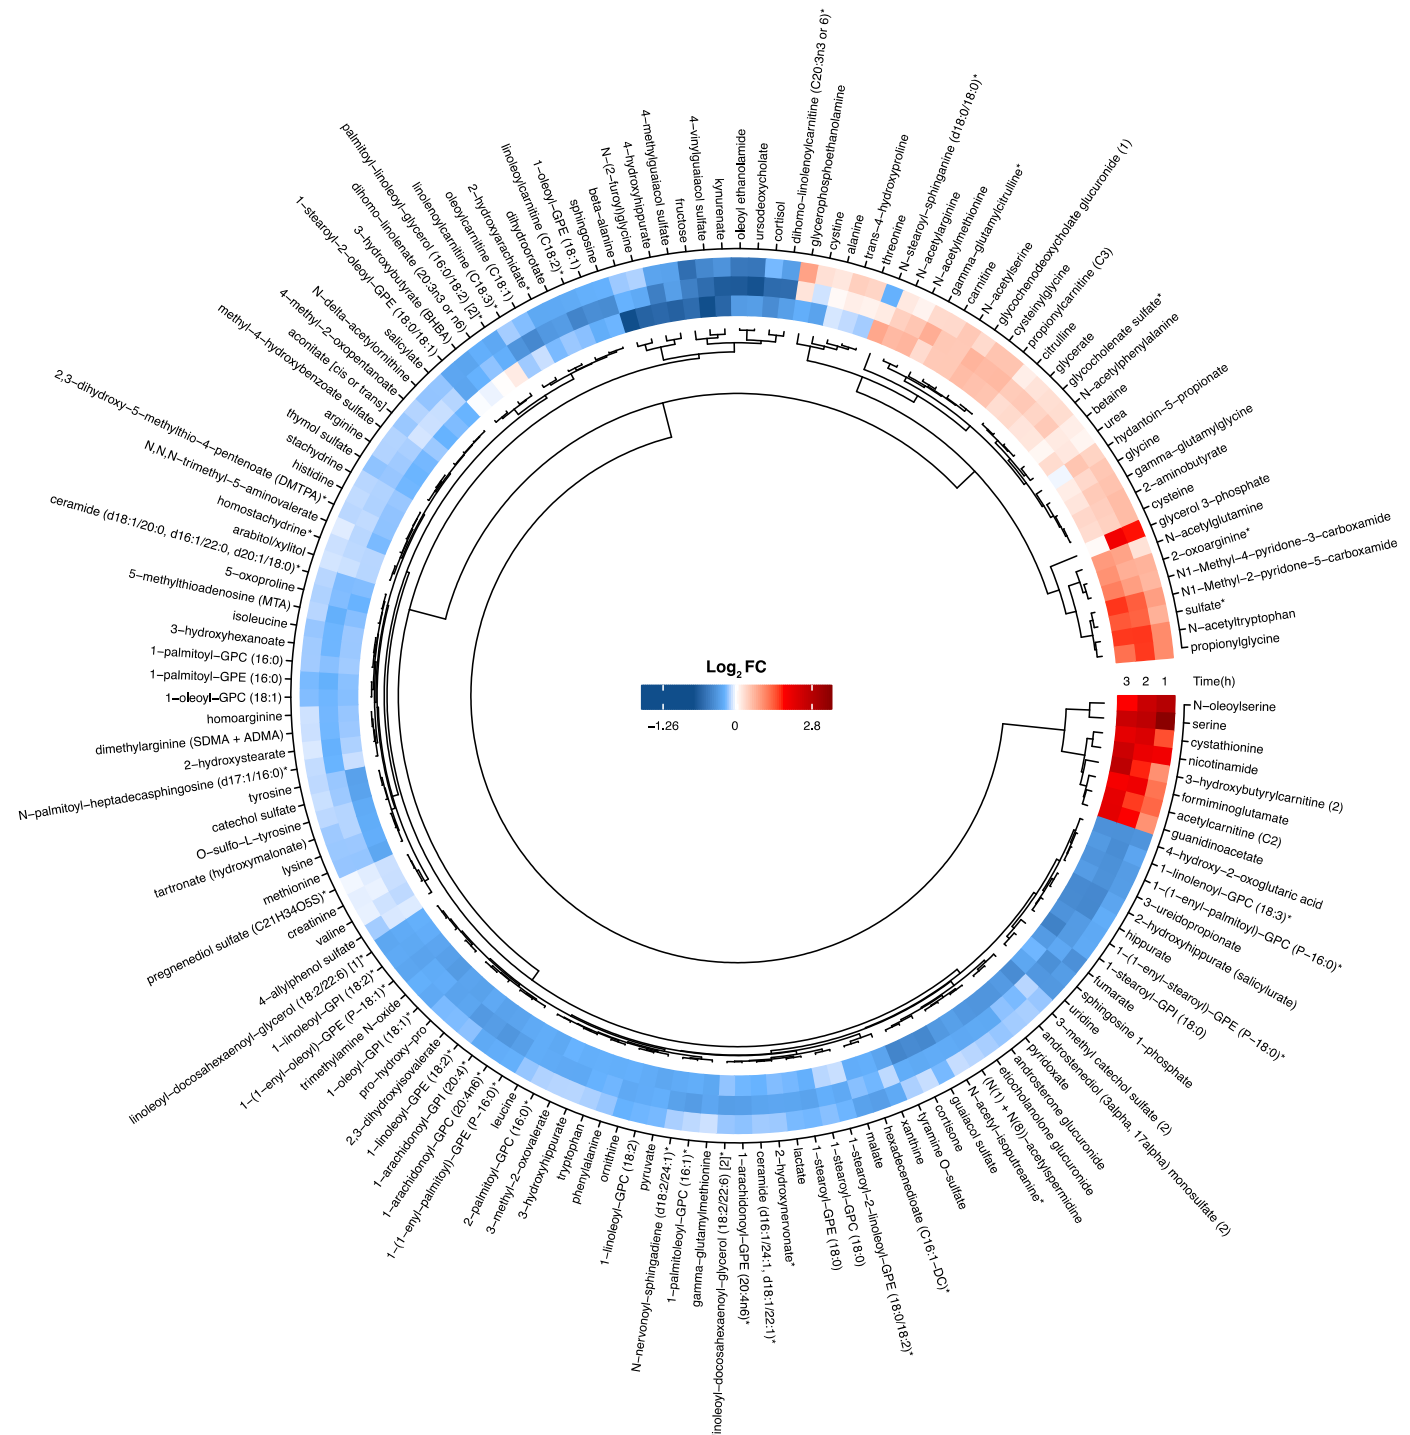

**Appendix Figure S2.** Changes in plasma level of metabolites in at least 2 out of 3 time points compared to baseline based on un-targeted metabolomics measurement. Identified metabolites were clustered based on hierarchical analysis using log<sub>2</sub> FC as a distance metric. Significance level of P-value < 0.05 after FDR adjustment.



A

L-serine (nM)

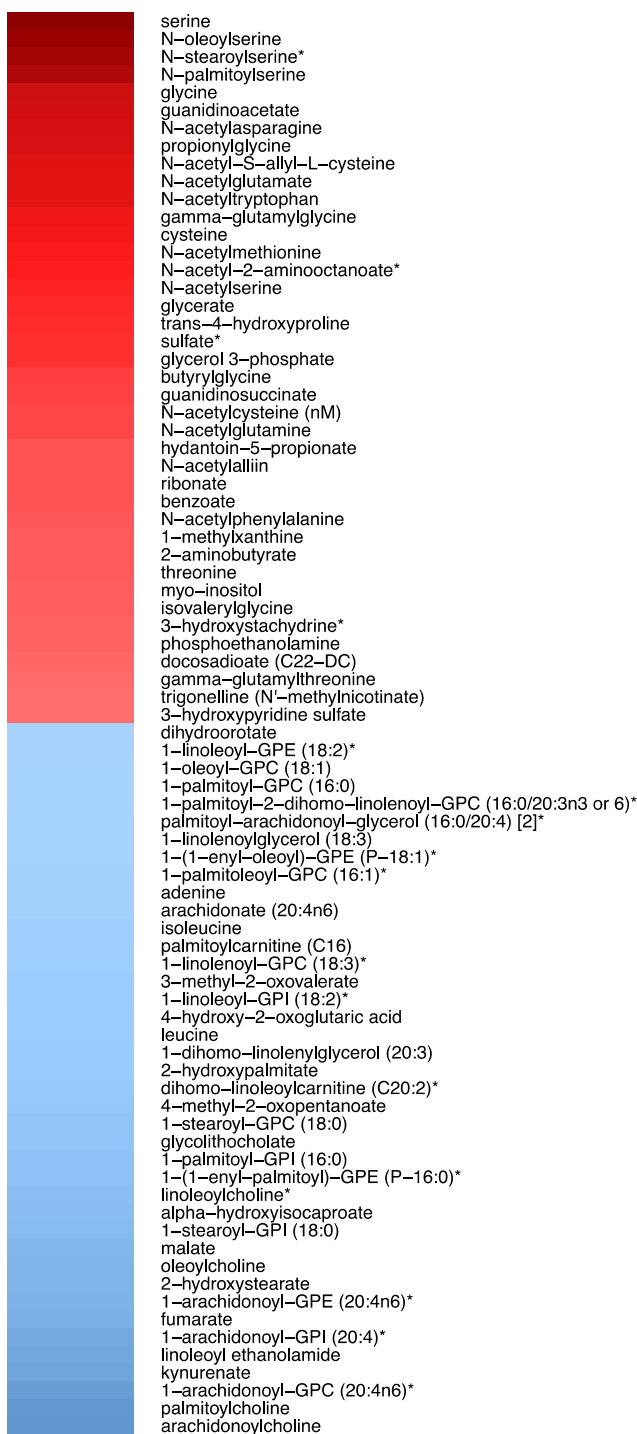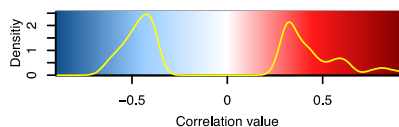

B

L-carnitine (nM)

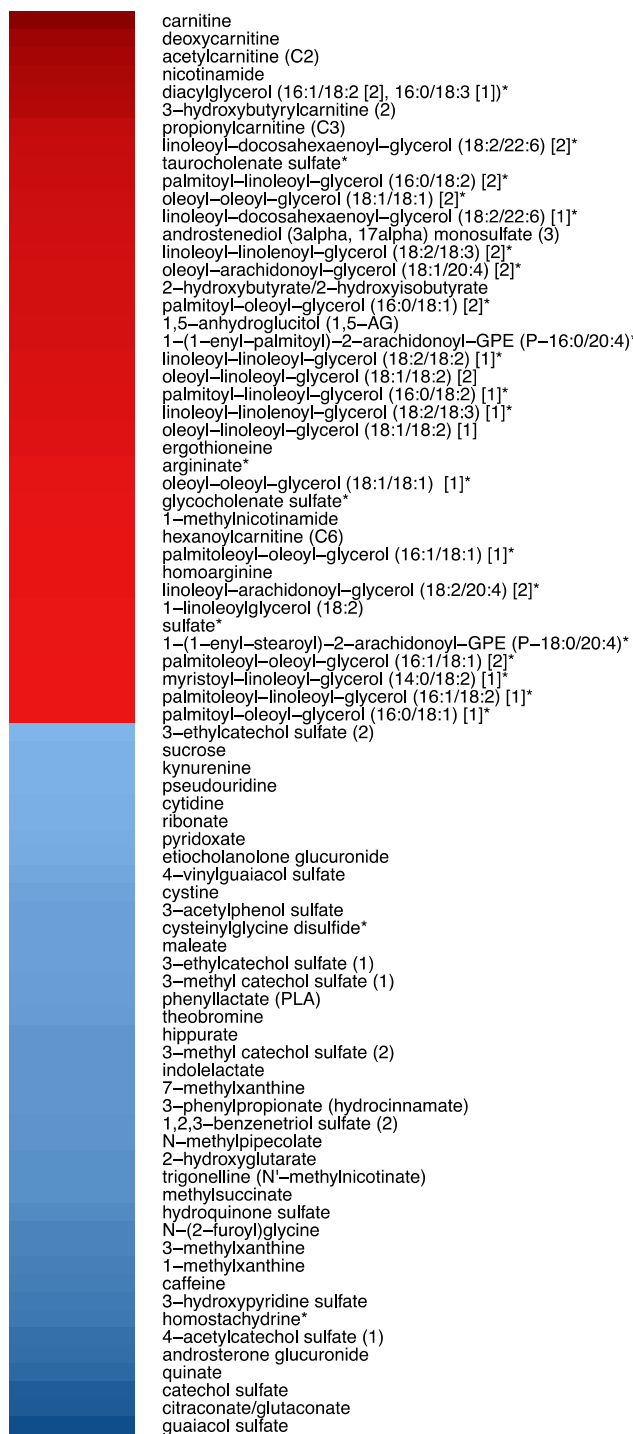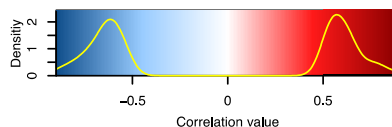

**Appendix Figure S4.** Top and bottom 40 metabolites (un-targeted & targeted metabolomics) that are significantly associated with supplemented L-Serine and L-Carnitine based on Spearman correlation analysis.



A

## Nicotinamide

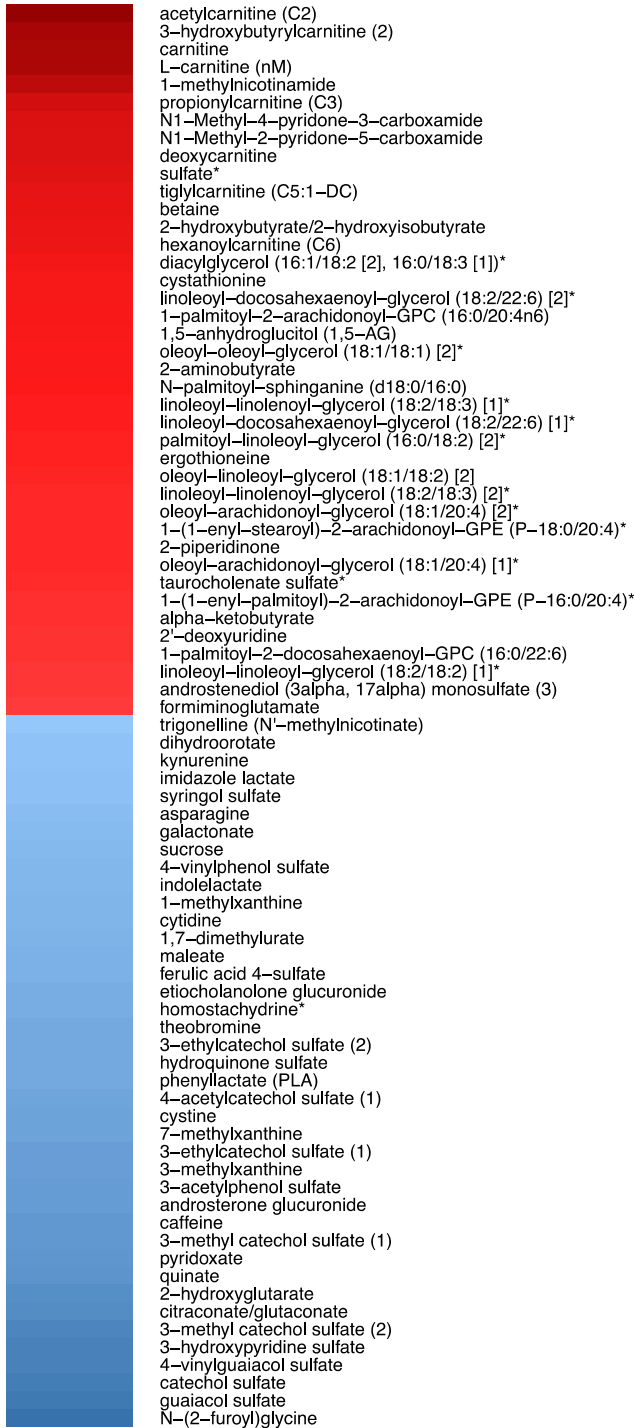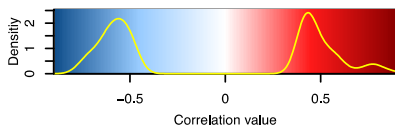

B

## N-acetylcysteine (nM)

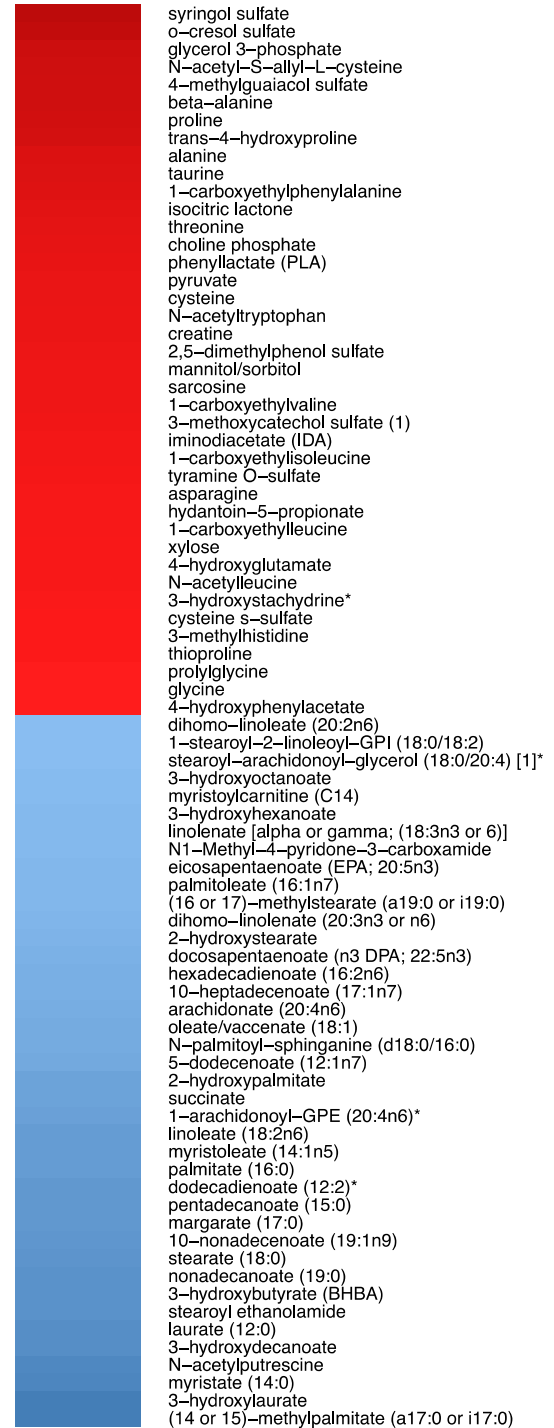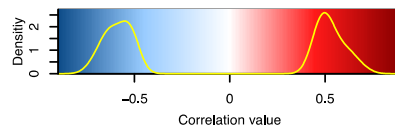

**Appendix Figure S5.** (A – B) Top and bottom 40 metabolites (un-targeted & targeted metabolomics) that are significantly associated with supplemented N-acetylcysteine and Nicotinamide based on Spearman correlation analysis.

## L-carnitine, dose = 8.3 g every 12 h

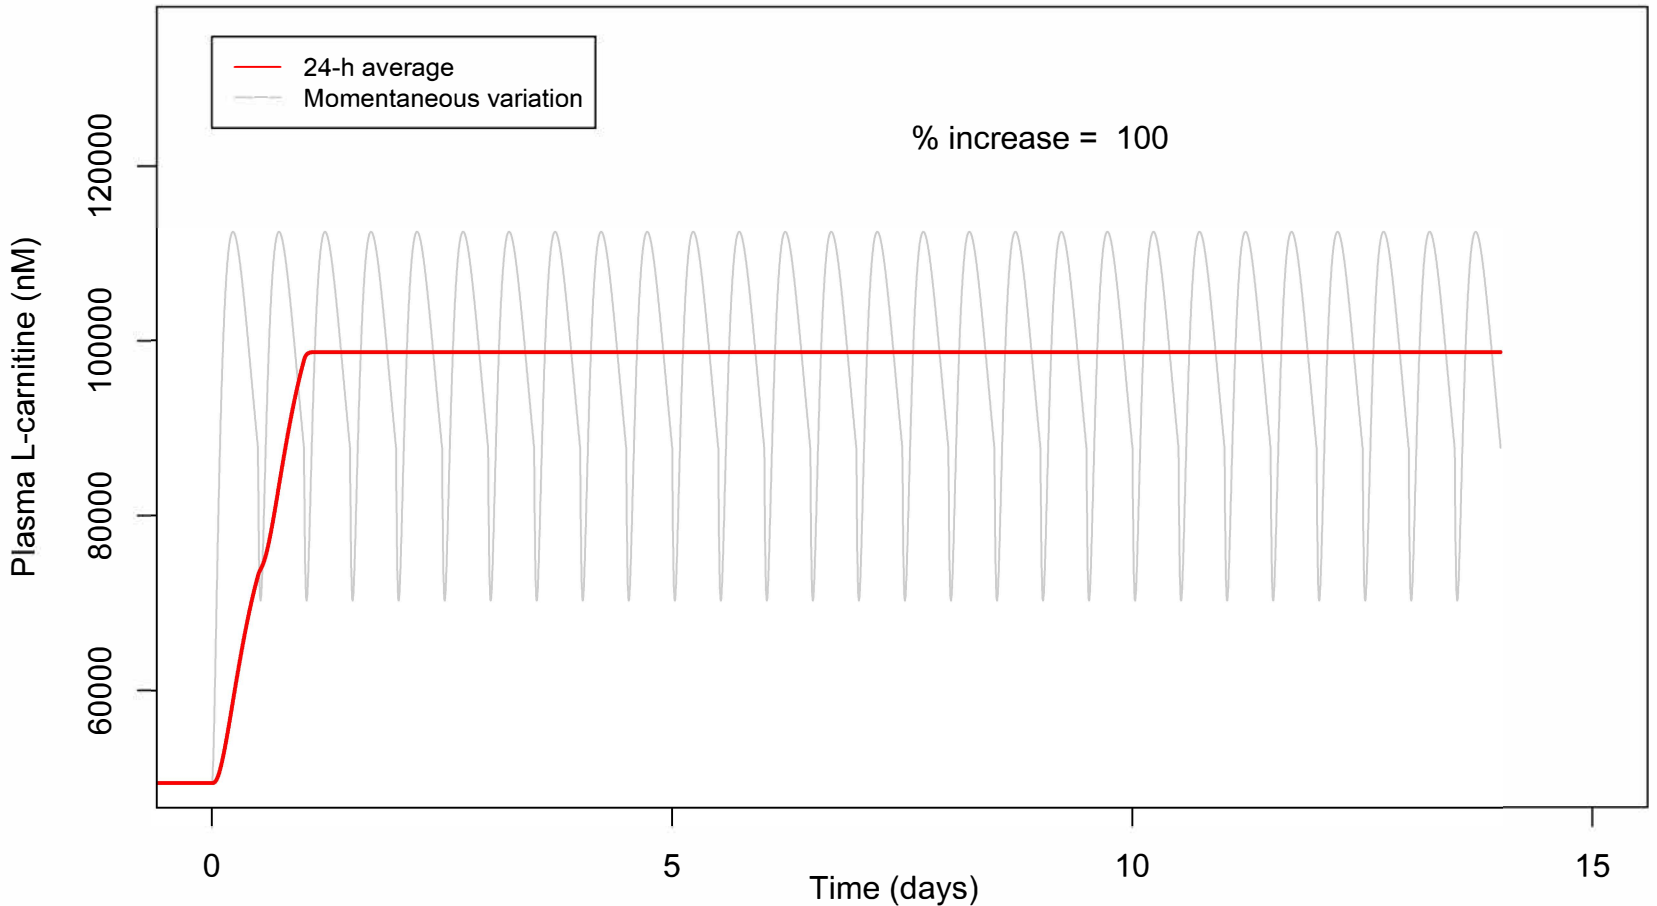

**Appendix Figure S6.** Predicted plasma L-carnitine during two weeks of simulated twice-daily supplementation: 24-hour moving average value indicated in red and continuous/momentaneous indicated in gray.
